# Supplementary material for: Structural and functional insights into the chloroplast division site regulators PARC6 and PDV1 in the intermembrane space
Source: PubMed Central journal article supplement — Proc Natl Acad Sci U S A. 2023 Jan 25;120(5):e2215575120. doi: 10.1073/pnas.2215575120 (PMC9945983; doi:10.1073/pnas.2215575120), 2023-01-25
Supplement: pnas.2215575120.sapp.pdf [file pnas.2215575120.sapp.pdf]

## Supporting Information

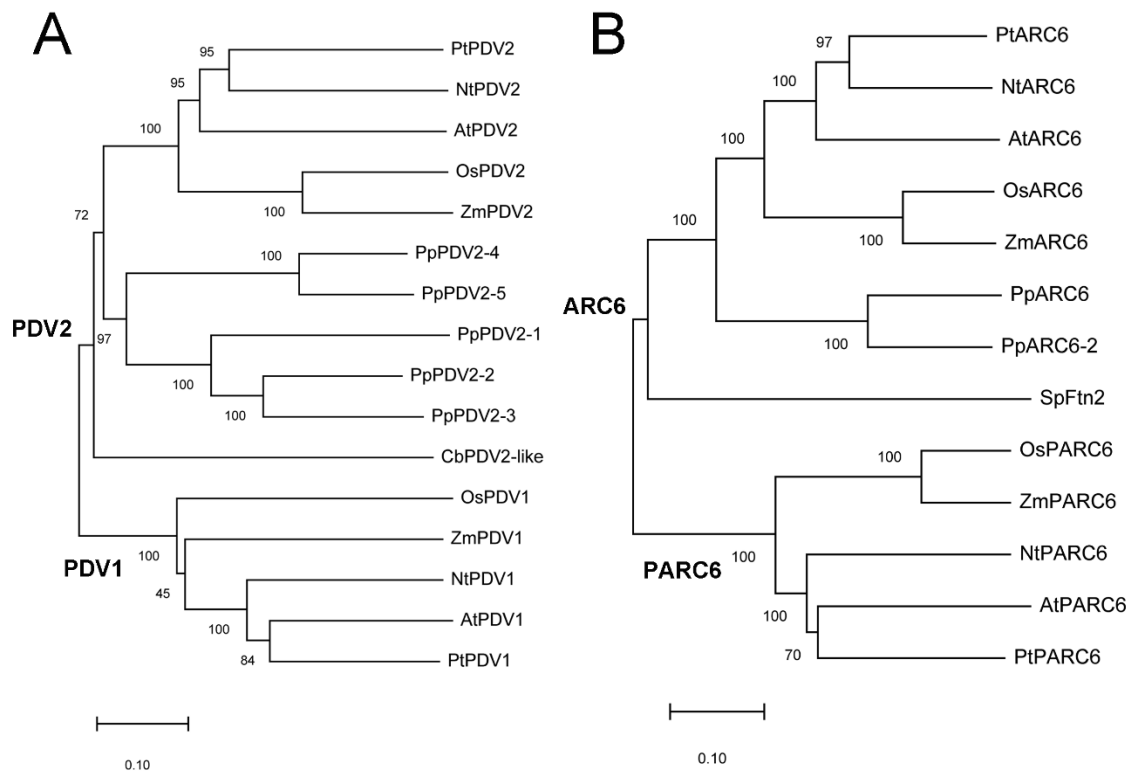

**Fig. S1.** Phylogenetic analysis of PDV1, PDV2, ARC6 and PARC6. (A) A phylogenetic tree of PDV1 and PDV2 in various plants. *At*, *Arabidopsis thaliana*; *Nt*, *Nicotiana tabacum*; *Pt*, *Populus trichocarpa*; *Os*, *Oryza sativa*; *Zm*, *Zea mays*; *Pp*, *Physcomitrium (Physcomitrella) patens*. *Cb*, *Chara braunii*. (B) A phylogenetic tree of PARC6 and ARC6 in various species. Plant species used for the analysis are mostly the same as those in (A). *Sp*, *Synechocystis sp. PCC 6714*. Accession numbers of the sequences used for the analysis are listed in Table S1.

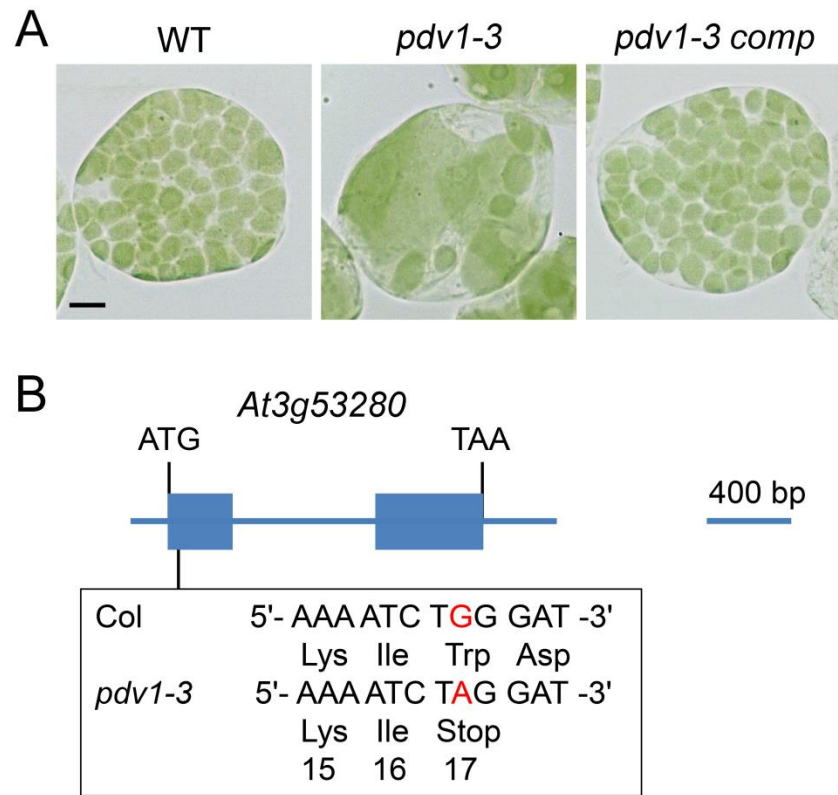

**Fig. S2.** Identification of a new mutant allele of *PDV1*, *pdv1-3*. (A) Chloroplast phenotypes of mesophyll cells in 4-week-old plants. WT, wild-type; *pdv1-3*, a new mutant allele of *PDV1*; *pdv1-3 comp*, *pdv1-3* complemented with a wild-type *PDV1* transgene. Scale bar (10  $\mu$ m) applies to all the images. (B) Gene structure and the mutation site of *pdv1-3* in *PDV1* gene. Blue boxes indicate the coding sequences and the straight line between blue boxes represents intron. Mutation site and the corresponding site in the wild type (Col) are indicated with red font color. ATG, start codon; TAA, stop codon.

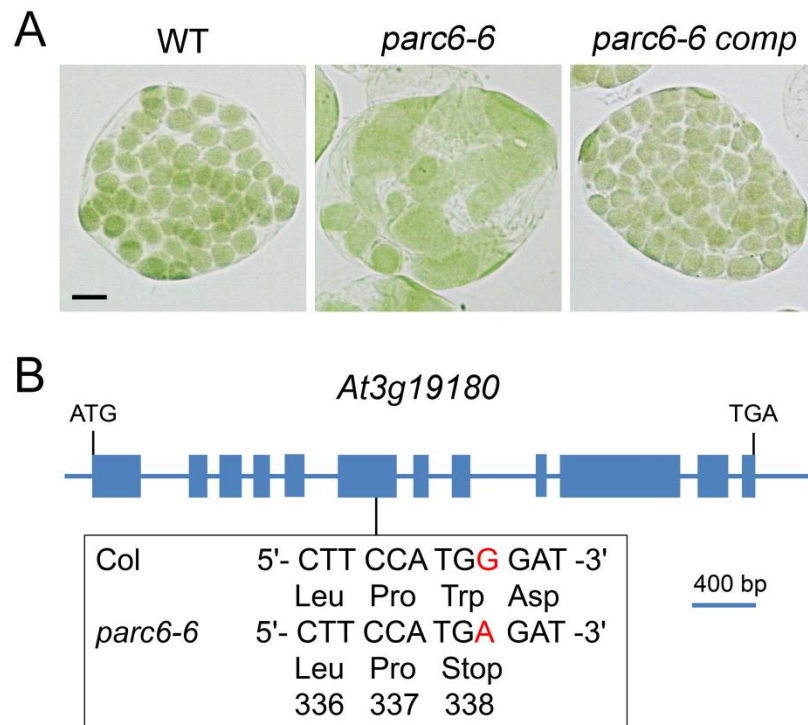

**Fig. S3.** Identification of a new mutant allele of *PARC6*, *parc6-6*. (A) Chloroplast phenotypes of mesophyll cells in 4-week-old plants. WT, wild-type; *parc6-6*, a new mutant allele of *PARC6*; *parc6-6 comp*, *parc6-6* complemented with a wild-type *PARC6* transgene. Scale bar (10  $\mu$ m) applies to all the images. (B) Gene structure and the mutation site of *parc6-6* in *PARC6* gene. Blue boxes indicate exons and the straight lines between blue boxes represent introns. Mutation site and the corresponding site in the wild type (Col) are indicated with red font color. ATG, start codon; TGA, stop codon.

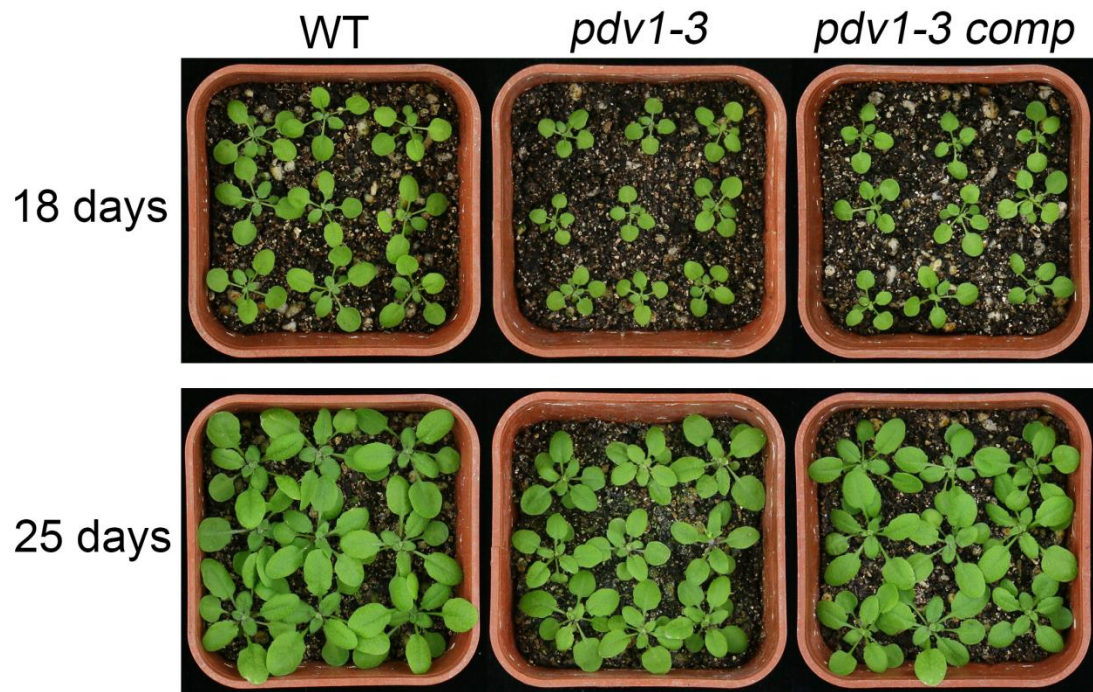

**Fig. S4.** Arabidopsis plants of 18- and 25-day old. The plants of wild-type, *pdv1-3* and *pdv1-3 comp* (a complementation line) were grown in soil for 18 days (upper panel, fast-growing) and 25 days (lower panel, close to mature).

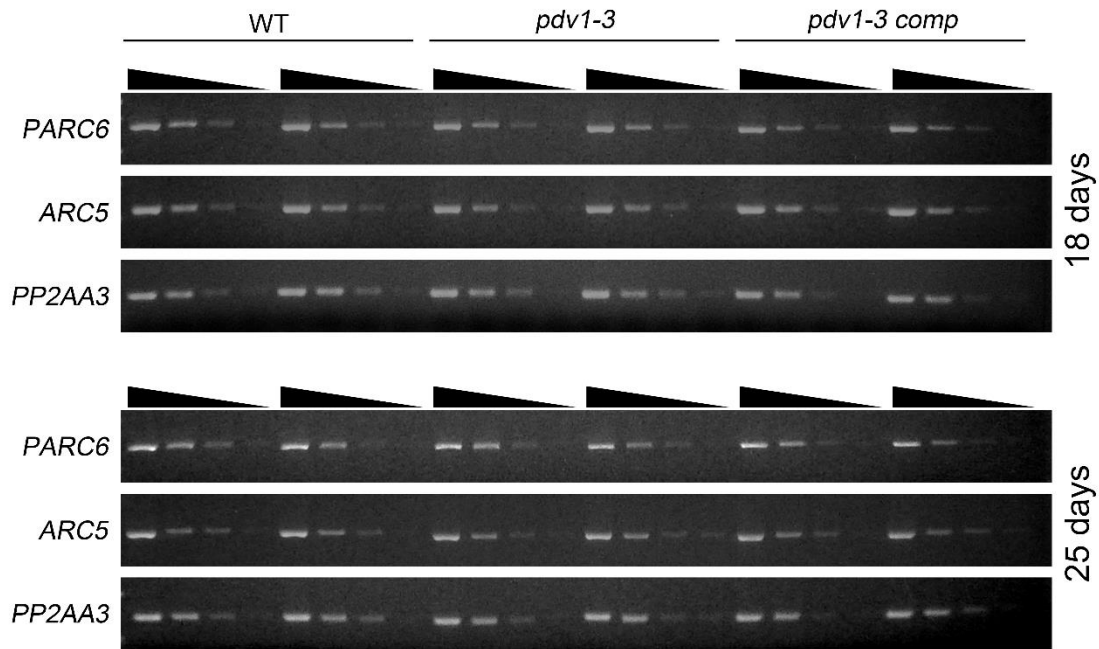

**Fig. S5.** Semi-quantitative RT-PCR analysis of the transcription level of *PARC6* and *ARC5* gene in WT, *pdv1-3* and *pdv1-3 comp* plants. Total RNA was isolated from the leaves of 18-day-old (upper panel) or 25-day-old (lower panel) plants. The black triangle indicates that the quantity of cDNA was diluted three times continuously, and the dilution factor was four (from left to right). *PP2AA3* was used as a control.

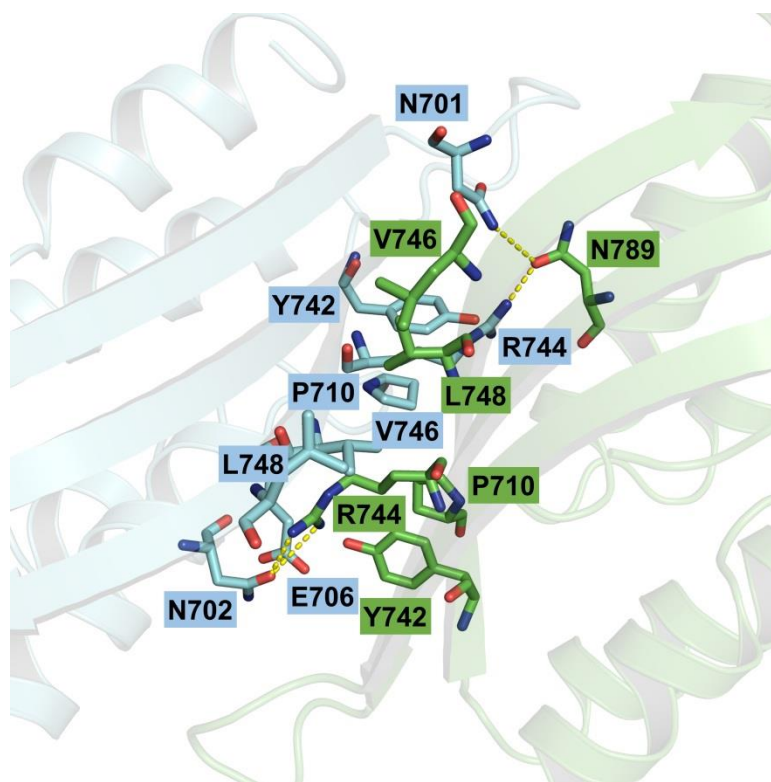

**Fig. S6.** Interaction at the dimerization interface of two PARC6C protomers. The two PARC6C protomers are shown on the left and right, and colored gray blue and gray green, respectively. Residues involved in interactions are shown as stick models. The hydrogen bonds are shown as yellow dashed lines.

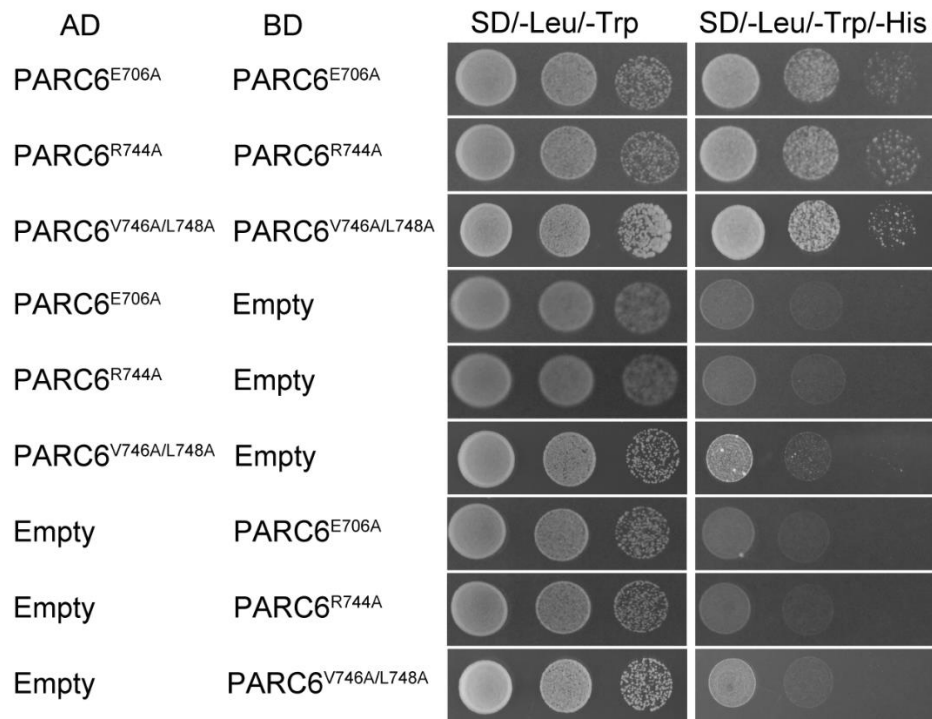

**Fig. S7.** Yeast two-hybrid assays of the effect of mutations on the self-interaction of PARC6. The two PARC6 molecules could still interact with each other with the mutations PARC6<sup>E706A</sup>, PARC6<sup>R744A</sup> and PARC6<sup>V746A/L748A</sup>, but with slightly lower capability. Cotransformed yeast grown in the presence (left panel) or absence (right panel) of histidine are shown. Tenfold serial dilutions were performed from the same starting culture. AD, activation domain; BD, binding domain; SD, synthetic dropout medium; Empty, empty pGADT7 or pGBKT7 vector.

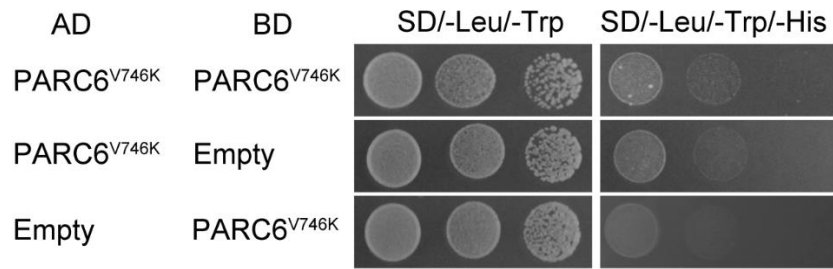

**Fig. S8.** Yeast two-hybrid assays of the effect of PARC6<sup>V746K</sup> on PARC6 self-interaction. The PARC6<sup>V746K</sup> mutation abolished the self-interaction PARC6. Cotransformed yeast grown in the presence (left panel) or absence (right panel) of histidine are shown. Tenfold serial dilutions are performed from the same starting culture. AD, activation domain; BD, binding domain; SD, synthetic dropout medium; Empty, empty pGADT7 or pGBKT7 vector.



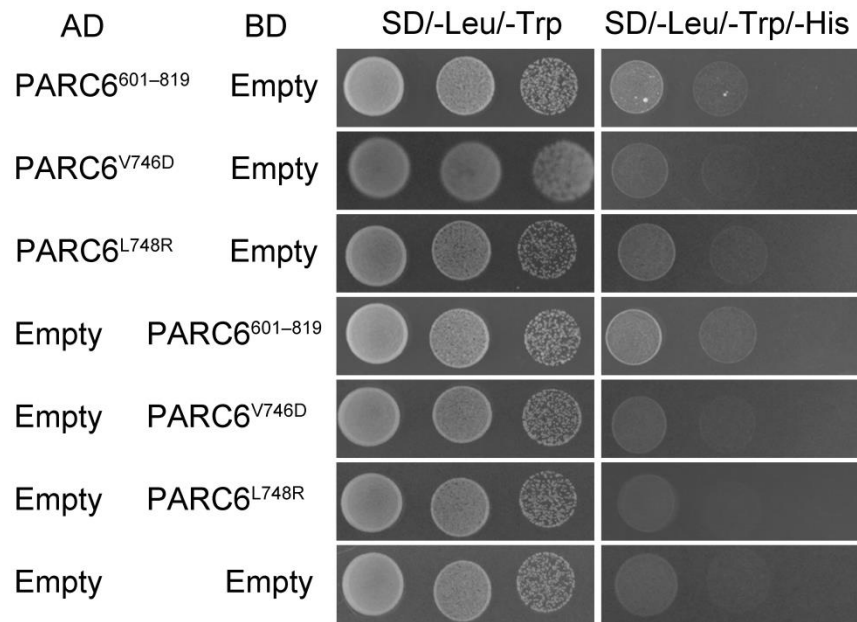

**Fig. S9.** Negative controls of the yeast two-hybrid assays in Fig. 4D. Cotransformed yeast grown in the presence (left panel) or absence (right panel) of histidine are shown. Tenfold serial dilutions were performed from the same starting culture. AD, activation domain; BD, binding domain; SD, synthetic dropout medium; Empty, empty pGADT7 or pGBKT7 vector.

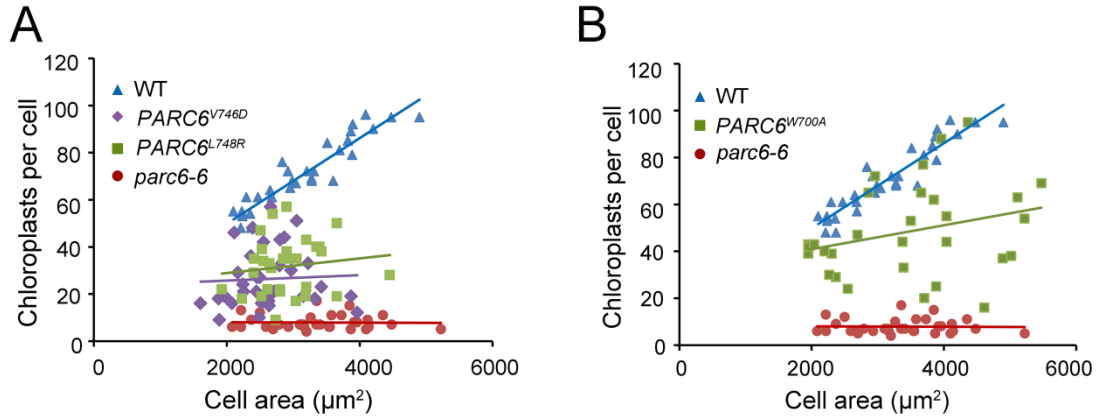

**Fig. S10.** Quantitative analysis of chloroplast number versus mesophyll cell plan area of four-week-old plants. (A) Relationship between chloroplast number and mesophyll cell plan area in WT, *parc6-6*, *PARC6<sup>V746D</sup>* and *PARC6<sup>L748R</sup>* shown in Fig. 4E. Slopes and  $R^2$  values of the best-fit lines are as follows: WT, 0.0181 ( $R^2=0.8715$ ); *PARC6<sup>V746D</sup>*, 0.0011 ( $R^2=0.0023$ ); *PARC6<sup>L748R</sup>*, 0.0031 ( $R^2=0.0172$ ); *parc6-6*, 0.0003 ( $R^2=0.0049$ ). (B) Relationship between chloroplast number and mesophyll cell plan area in WT, *parc6-6*, *PARC6<sup>W700A</sup>* shown in Fig. 5E. Slopes and  $R^2$  values of the best-fit lines are as follows: WT, 0.0181 ( $R^2=0.8715$ ); *PARC6<sup>W700A</sup>*, 0.0051 ( $R^2=0.0793$ ); *parc6-6*, 0.0003 ( $R^2=0.0049$ ).  $n \geq 30$  cells for each sample.

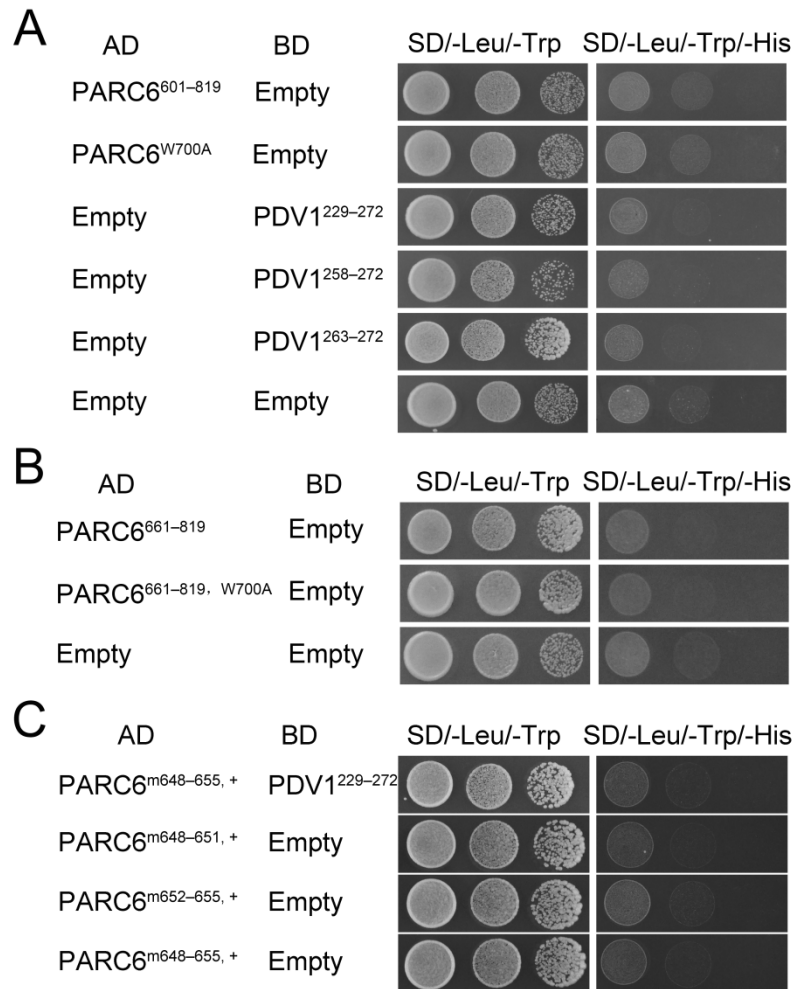

**Fig. S11.** Negative controls of the yeast two-hybrid assays in Fig. 5D, G and H, respectively. Cotransformed yeast grown in the presence (left panel) or absence (right panel) of histidine are shown. Tenfold serial dilutions were performed from the same starting culture. PARC6<sup>m648-655, +</sup> represents the mutant with mutations V648S, L649D, I650S, D651A, M652S, L653D, K654A, M655S, and W700A in PARC6<sup>601-819</sup>. AD, activation domain; BD, binding domain; SD, synthetic dropout medium; Empty, empty pGADT7 or pGBKT7 vector.

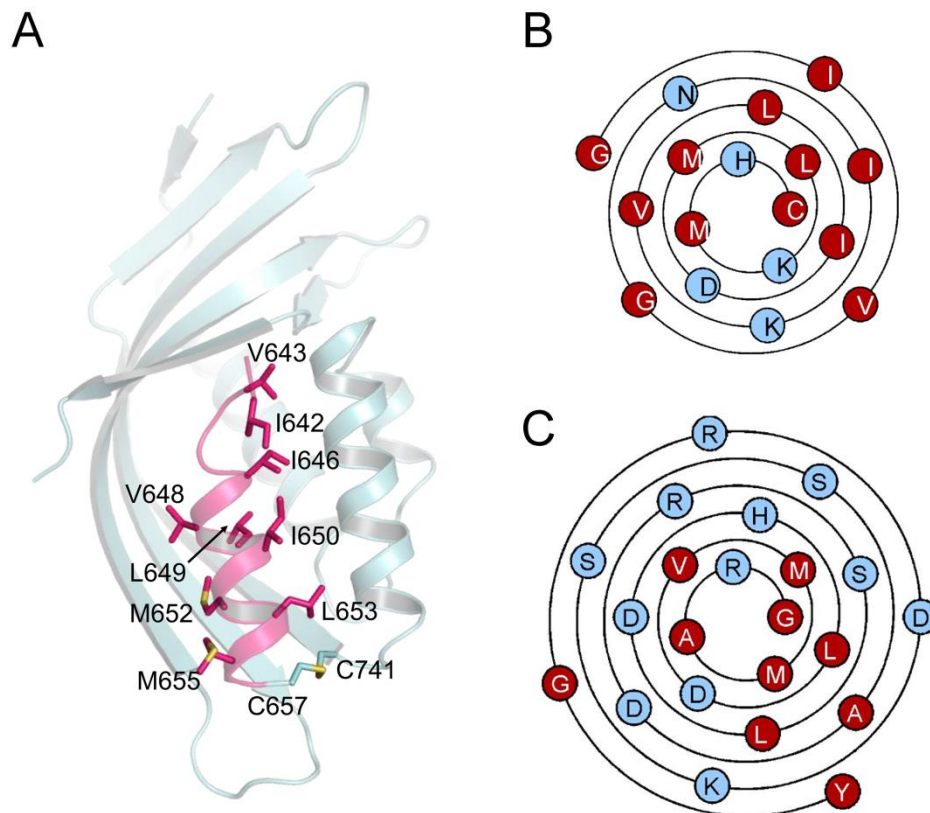

**Fig. S12.** The lid of PARC6C pocket and the C-terminus of PDV1 both have a hydrophobic side. (A) A structural view of the lid of PARC6C pocket. The hydrophobic side chains are shown as red sticks. (B) A wenxiang diagram of the lid of PARC6C pocket (residues 641–657). Hydrophobic residues are shown with a red background. (C) A wenxiang diagram of the C-terminus of PDV1 (residues 251–272). Hydrophobic residues are shown with a red background.

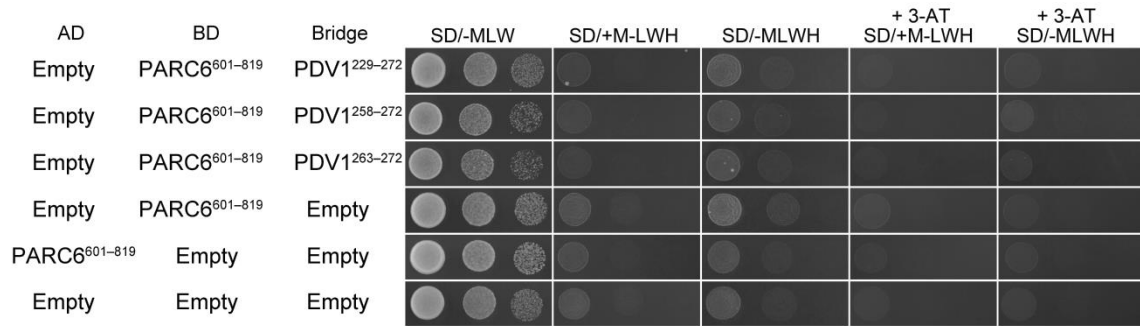

**Fig. S13.** Negative controls of yeast three-hybrid assays in Fig. 6A. As “bridge” proteins, the coding sequences of the C terminal regions of PDV1 (PDV1<sup>229-272</sup>, PDV1<sup>258-272</sup> or PDV1<sup>263-272</sup>) were cloned into the second multiple clone site of pBridge under the control of the *Met25* promoter. The expression of PDV1 was suppressed by methionine in the growth medium. 3 mM 3-AT was used for a higher stringency.

**A**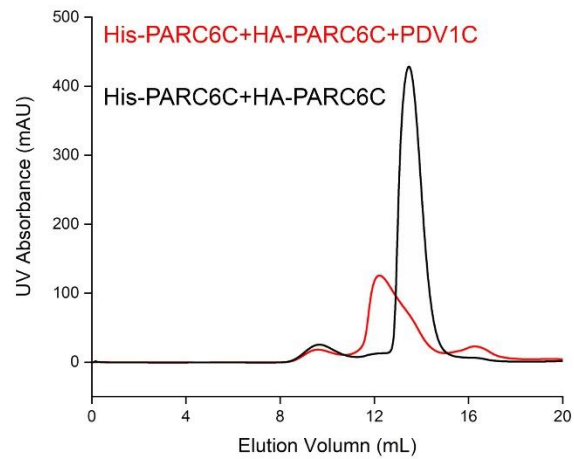**B**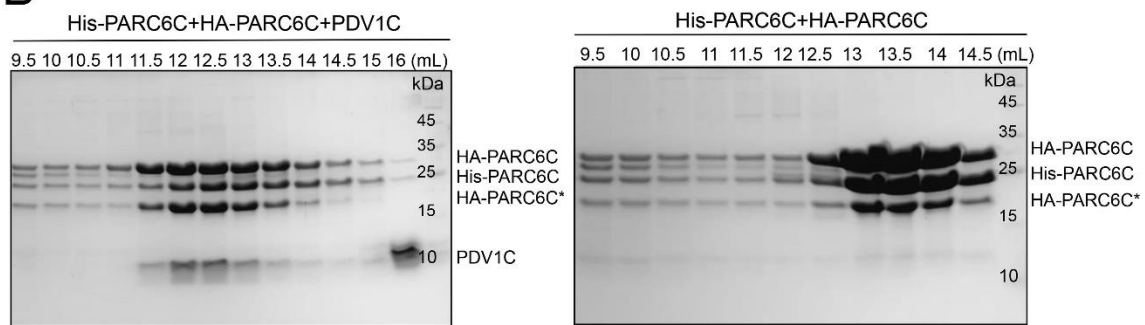

**Fig. S14.** PDV1C induced the dimerization of PARC6C. (A) Gel filtration analysis of the mix of His-PARC6C/HA-PARC6C, and the mix of His-PARC6C/HA-PARC6C/PDV1C (residues 226–272). (B) Coomassie Brilliant Blue staining of the peak fractions shown on an SDS-PAGE. HA-PARC6C\* indicates the degraded form of HA-PARC6C protein.

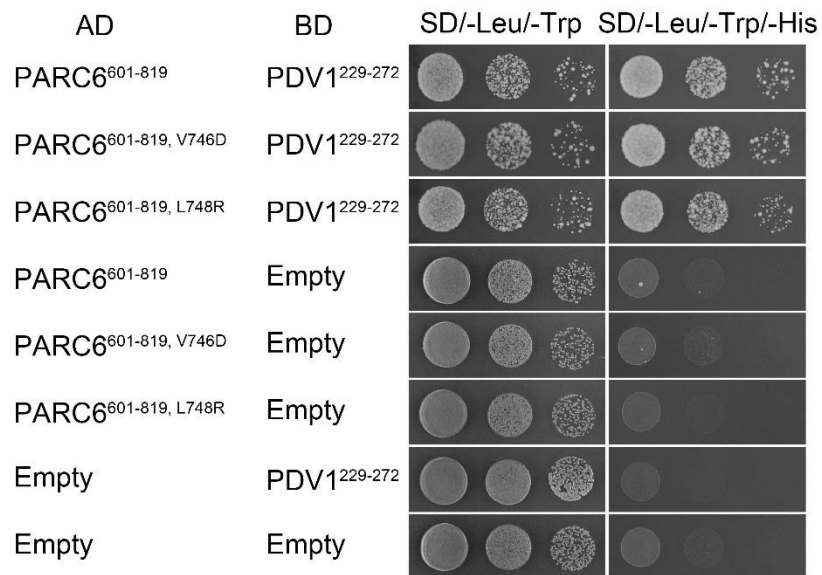

**Fig. S15.** Yeast-two-hybrid analysis of the effect of PARC6<sup>V746D</sup> and PARC6<sup>L748R</sup> mutations on the interaction between PARC6 and PDV1. In Fig. 4D, the mutations of V746D and L748R were shown to abolish the self-interaction of PARC6.

**Table S1.** The corresponding species and NCBI accession numbers of the sequences used in the phylogenetic analyses in Fig. S1.

| <b>Names</b> | <b>Species</b>                              | <b>Accession numbers</b> |
|--------------|---------------------------------------------|--------------------------|
| PtPDV2       | <i>Populus trichocarpa</i>                  | XP_002306076.1           |
| NtPDV2       | <i>Nicotiana tabacum</i>                    | XP_016455399.1           |
| AtPDV2       | <i>Arabidopsis thaliana</i>                 | NP_028242.1              |
| OsPDV2       | <i>Oryza sativa Indica Group</i>            | EAZ02618.1               |
| ZmPDV2       | <i>Zea mays</i>                             | NP_001143832.1           |
| PpPDV2-1     | <i>Physcomitrium patens</i>                 | PNR34934.1               |
| PpPDV2-2     | <i>Physcomitrium patens</i>                 | XP_024360080.1           |
| PpPDV2-3     | <i>Physcomitrium patens</i>                 | XP_024404227.1           |
| PpPDV2-4     | <i>Physcomitrium patens</i>                 | XP_024402881.1           |
| PpPDV2-5     | <i>Physcomitrium patens</i>                 | XP_024393078.1           |
| CbPDV2-like  | <i>Chara braunii</i>                        | GBG86295.1               |
| OsPDV1       | <i>Oryza sativa Indica Group</i>            | EAY73086.1               |
| ZmPDV1       | <i>Zea mays</i>                             | NP_001182834.1           |
| AtPDV1       | <i>Arabidopsis thaliana</i>                 | NP_200140.1              |
| PtPDV1       | <i>Populus trichocarpa</i>                  | XP_002318370.2           |
| NtPDV1       | <i>Nicotiana tabacum</i>                    | XP_016475564.1           |
| PtARC6       | <i>Populus trichocarpa</i>                  | XP_006383731.2           |
| NtARC6       | <i>Nicotiana tabacum</i>                    | XP_016465359.1           |
| AtARC6       | <i>Arabidopsis thaliana</i>                 | NP_199063.1              |
| OsARC6       | <i>Oryza sativa (indica cultivar-group)</i> | DAA01472.1               |
| ZmARC6       | <i>Zea mays</i>                             | NP_001148117.1           |
| SpFtn2       | <i>Synechocystis sp. PCC 6714</i>           | AIE75001.1               |
| PpARC6-1     | <i>Physcomitrium patens</i>                 | XP_024361348.1           |
| PpARC6-2     | <i>Physcomitrium patens</i>                 | XP_024359405.1           |
| OsPARC6      | <i>Oryza sativa Japonica Group</i>          | XP_015636653.1           |
| ZmPARC6      | <i>Zea mays</i>                             | NP_001346328.1           |
| AtPARC6      | <i>Arabidopsis thaliana</i>                 | NP_188549.2              |
| PtPARC6      | <i>Populus trichocarpa</i>                  | XP_024438100.1           |
| NtPARC6      | <i>Nicotiana tabacum</i>                    | XP_016514193.1           |



**Table S2.** Data collection and refinement statistics.

|                                                          | PARC6 <sup>640-819</sup> | PARC6 <sup>685-819</sup> – PDV1 <sup>263-272</sup> |
|----------------------------------------------------------|--------------------------|----------------------------------------------------|
| <b>Data collection</b>                                   |                          |                                                    |
| Space group                                              | C222 <sub>1</sub>        | C222 <sub>1</sub>                                  |
| Cell dimensions                                          |                          |                                                    |
| <i>a</i> , <i>b</i> , <i>c</i> (Å)                       | 44.128, 121.669, 130.206 | 91.454, 95.827, 196.566                            |
| $\alpha$ , $\beta$ , $\gamma$ (°)                        | 90.00, 90.00, 90.00      | 90.00, 90.00, 90.00                                |
| Resolution (Å)                                           | 50-2.534                 | 50-2.894 (2.997-2.894)*                            |
| <i>R</i> <sub>sym</sub> or <i>R</i> <sub>merge</sub> (%) | 18.1 (90.1)              | 19.4 (89.0)                                        |
| <i>I</i> / $\sigma$ ( <i>I</i> )                         | 13.2 (2.5)               | 11.3 (2.6)                                         |
| Completeness (%)                                         | 99.9 (100.0)             | 99.7 (99.9)                                        |
| Redundancy                                               | 10.7 (9.7)               | 7.1 (6.1)                                          |
| <b>Refinement</b>                                        |                          |                                                    |
| Resolution (Å)                                           | 44.45-2.534              | 47.91-2.894                                        |
| No. reflections                                          | 11333                    | 18678                                              |
| <i>R</i> <sub>work</sub> / <i>R</i> <sub>free</sub>      | 0.219/0.271              | 0.223/0.271                                        |
| No. atoms                                                | 2460                     | 4583                                               |
| Protein                                                  | 2447                     | 4583                                               |
| Ligand/ion                                               | 0                        | 0                                                  |
| Water                                                    | 13                       | 0                                                  |
| <i>B</i> factors                                         | 40.54                    | 46.05                                              |
| Protein                                                  | 40.59                    | 46.05                                              |
| Ligand/ion                                               |                          |                                                    |
| Water                                                    | 31.45                    |                                                    |
| R.m.s. deviations                                        |                          |                                                    |
| Bond lengths (Å)                                         | 0.005                    | 0.011                                              |
| Bond angles (°)                                          | 1.18                     | 1.55                                               |
| Ramachandran plot (%)                                    |                          |                                                    |
| Favored                                                  | 96.91                    | 97.79                                              |
| Allowed                                                  | 2.41                     | 2.03                                               |
| Outliers                                                 | 0.69                     | 0.18                                               |

\*For each structure one crystal was used. \*Values in parentheses are for highest-resolution shell.

**Table S3.** Sequences of primers used in this study.

| Primers                                                               | Sequences (5'-3')                   |
|-----------------------------------------------------------------------|-------------------------------------|
| <b>Primers for constructing plasmids used in Y2H assays</b>           |                                     |
| PDV1Y2H-1                                                             | CCTCATATGGCTACTAGTGAACATCATCTGCAG   |
| PDV1Y2H-2                                                             | CCTCATATGGCTGACAGAAGTTTGGATCACTTG   |
| PDV1Y2H-3                                                             | CCTCATATGGATCACTTGGACGTAATGATGGCTC  |
| PDV1Y2H-4                                                             | CCTGGATCCGCCGAGAGATCTTGTGATTTACAAG  |
| PARC6Y2H-1                                                            | CCTCATATGGGTAGACTACAGAGTATGCCTATATC |
| PARC6Y2H-2                                                            | CCTCATATGCCGGATGCCCTGTATCTGAAAAG    |
| PARC6Y2H-3                                                            | CCTGGATCCGACAATCCTGTGGGTTACTAAGG    |
| PARC6-745Up                                                           | GAACCTCCAATAACAGGATTTTC             |
| PARC6-V746D                                                           | GATCTGCTTCATCTTGAGGTTTTG            |
| PARC6-747Up                                                           | CAGAACGAACCTCCAATAACAG              |
| PARC6-L748R                                                           | AGGCATCTTGAGGTTTTGCAAGC             |
| PARC6-699Up                                                           | CTGTCTCACAAGCTCTTCC                 |
| PARC6-W700A                                                           | GCGGAAAATGTTAAGGCTGAAGC             |
| PARC6-648-51Mu                                                        | GGCAGAGTCCGATTTGATGTTTCCCACGATACC   |
| PARC6-652down                                                         | ATGTTAAAGATGCATTGTGGCG              |
| PARC6-651up                                                           | GTCAATGAGCACTTTGATGTTTCC            |
| PARC6-652-55 Mu                                                       | TCTGATGCGTCCCATTGTGGCGAACATCCG      |
| PARC6-705Up                                                           | AGCCTTAACATTTTCCCCTG                |
| PARC6-E706A                                                           | GCAGCTCTTGGACCAACACATC              |
| PARC6-743Up                                                           | CCAATAACAGGATTTGCGCC                |
| PARC6-R744A                                                           | GCTTTCGTTCTGCTTCATCTTGAG            |
| PARC6-V746A/L748A                                                     | GCTCTGGCACATCTTGAGGTTTTGCAAGC       |
| PARC6-V746K                                                           | AAACTGCTTCATCTTGAGGTTTTG            |
| <b>Primers for constructing plasmids used in Y3H assays</b>           |                                     |
| ARC6H-8                                                               | GTTGGATCCACCTGAGACTTTCCTACACCG      |
| ARC6H-20                                                              | CCTGAATTCGGTAGACTACAGAGTATGCC       |
| PDV1-34                                                               | CCTGCGGCCGCTGCTACTAGTGAACATCATCTGC  |
| PDV1-35                                                               | CCTAGATCTGATTTACAAGAAAGCCTAACCAC    |
| PDV1-36                                                               | CCTGCGGCCGCTGACAGAAGTTTGGATCACTTG   |
| PDV1-37                                                               | CCTGCGGCCGCTCACTTGGACGTAATGATGG     |
| <b>Primers for constructing plasmids used in plant transformation</b> |                                     |
| ARC6H-10                                                              | CATGGATCCTCAGCCTCATCTTGACCTA        |
| ARC6H-11                                                              | CATACGCGTCAAACCTGAGACTTTCCTACAC     |
| PARC6-745Up                                                           | GAACCTCCAATAACAGGATTTTC             |
| PARC6-V746D                                                           | GATCTGCTTCATCTTGAGGTTTTG            |

|             |                                  |
|-------------|----------------------------------|
| PARC6-747Up | CAGAACGAACCTCCAATAACAG           |
| PARC6-L748R | AGGCATCTTGAGGTTTTGCAAGC          |
| PARC6-699Up | CTGTCTCACAAGCTCTTCC              |
| PARC6-W700A | GCGGAAAATGTTAAGGCTGAAGC          |
| PDV1-15     | CTTACGCGTGTGTAGACAAGTTCGATCTCTGG |
| PDV1-28     | CCTGGATCCCTGTTTCAAAGGCCGAAC      |

**Primers for semi-quantitative RT-PCR analysis**

|               |                         |
|---------------|-------------------------|
| PARC6-652down | ATGTTAAAGATGCATTGTGGCG  |
| PARC6-789Up   | TTTTGCGTTTTTGGGCTGAG    |
| ARC5-4        | CCTTGCTCACGGTATCCAGC    |
| ARC5-5        | CCTTGCTCACGGTATCCAGC    |
| PP2AA3-1      | CCAAGCGTTGTGGAGAAC      |
| PP2AA3-2      | GAACCAAACACAATTCGTTGCTG |

**Primers for constructing plasmids used in protein expression**

|                     |                                                                     |
|---------------------|---------------------------------------------------------------------|
| PARC6-Nde640f       | GGGAAACATATGAATGGTATCGTGGGAAA                                       |
| PARC6-Xho819rstop   | CCGCTCGAGTCACTTCTGTATTTGAAT                                         |
| PARC6-Nde685f       | GGGAAACATATGAAGAGACCAATGGATAC                                       |
| PARC6-819-linker-f  | GATATTCAAATACAGAAGTCTACCGGAAACGCCT                                  |
| linker-addPDV1EcoRr | CGGAATTCTTAACCACGAGCCATCATTACGTCCAAGTGATCAGAT<br>CCGACGGTTCCGTCTCCT |
| PARC6-Nde642f       | ATACATATGATCGTGGGAAACATCAAAGTGCTCATTGACATGTTA<br>AAGATGCATTCTGGCGA  |
| PARC6-W700A-f       | AAGAGCTTGTGAGACAGGCGGAAAATGTTAAGGCTGA                               |
| PARC6-W700A-r       | TCAGCCTTAACATTTCCGCCTGTCTCACAAGCTCTT                                |
| PDV1-Nde226f        | GGAATTCCATATGCACCAAGTGGCTACTAGTGAA                                  |
| PDV1-Xho272rstop    | CCGCTCGAGTTAACCACGAGCCATCAT                                         |
| PARC6-640f1         | GATGTTCCAGATTATGCATATCCCTATGACGTACCCGACTATGCA<br>AATGGTATCGTGGG     |
| PARC6-Ndef2         | ATACATATGTACCCATACGATGTTCCAGATTACGCTTACCCATACG<br>ATGTTCCAGATTA     |
| PARC6-685f1         | GATGTTCCAGATTATGCATATCCCTATGACGTACCCGACTATGCA<br>AAGAGACCAATGGA     |

---
